# Supplementary material
Source: publisher figshare collection journal article supplement (https://tandf.figshare.com/articles/dataset/_/6165845)
Supplement: Supplementary file 1 [file 1]

Archive with 2 entries (2 files):
- Supplementary Figures Pin1_Legname et al.pptx
- fig1.pdf
